# Supplementary material for: Synthetic Cationic Peptide IDR-1002 and Human Cathelicidin LL37 Modulate the Cell Innate Response but Differentially Impact PRRSV Replication in vitro
Source: Front Vet Sci. 2019 Jul 12;6:233. doi: 10.3389/fvets.2019.00233 (PMC6640542; doi:10.3389/fvets.2019.00233)
Supplement: Supplementary Table 1 — Two-way ANOVA (type II sum of squares; statsmodels v0.9.0) was performed on the cytokine data. [file Table_1.xlsx]

## Sheet: Feuil1
Supplementary Table 1: Two-way ANOVA (type II sum of squares; statsmodels v0.9.0) was performed on the cytokine data.
CCL2	sum_sq	df	F	PR(>F)
C(Peptide)	0.65731	2	3.66248	0.0402742
C(PolyIC)	6.83149	1	76.129	4.6607e-09
C(Peptide):C(PolyIC)	0.063364	2	0.353059	0.705982
Residual	2.24339	25	NaN	NaN
CCL5	sum_sq	df	F	PR(>F)
C(Peptide)	0.185449	2	1.09508	0.350652
C(PolyIC)	5.49989	1	64.9541	2.76792e-08
C(Peptide):C(PolyIC)	0.032514	2	0.191999	0.826563
Residual	2.03216	24	NaN	NaN
IFNbeta	sum_sq	df	F	PR(>F)
C(Peptide)	0.613186	2	3.95455	0.0316624
C(PolyIC)	37.411	1	482.541	2.58977e-18
C(Peptide):C(PolyIC)	0.20858	2	1.34517	0.278029
Residual	2.01576	26	NaN	NaN
SOCS1	sum_sq	df	F	PR(>F)
C(Peptide)	1.20631	2	3.82901	0.0360354
C(PolyIC)	13.2749	1	84.2735	2.54304e-09
C(Peptide):C(PolyIC)	0.063942	2	0.202962	0.817696
Residual	3.78053	24	NaN	NaN
STAT6	sum_sq	df	F	PR(>F)
C(Peptide)	0.005133	2	0.026403	0.973971
C(PolyIC)	1.04011	1	10.6994	0.003233
C(Peptide):C(PolyIC)	0.045248	2	0.232725	0.794139
Residual	2.3331	24	NaN	NaN
